# Supplementary material
Source: PubMed Central journal article supplement (PMC1472539)
Supplement: pnas_0600871103_2.pdf [file pnas_0600871103_2.pdf]

**Table 2. Distribution of A118G single-nucleotide polymorphism (SNP) of the *OPRM1* gene**

|                 | <b>Controls (<i>n</i> = 26)</b> | <b>Heroin (<i>n</i> = 39)</b> |
|-----------------|---------------------------------|-------------------------------|
| <b>Genotype</b> |                                 |                               |
| A/A             | 24 (0.923)                      | 28 (0.718)                    |
| A/G             | 1 (0.038)                       | 10 (0.256)                    |
| G/G             | 1 (0.038)                       | 1 (0.026)                     |
| <b>Allele</b>   | ( <i>n</i> = 52)                | ( <i>n</i> = 78)              |
| A               | 49 (0.942)                      | 66 (0.846)                    |
| G               | 3 (0.058)                       | 12 (0.154)                    |

Number (frequency).
