# Supplementary material
Source: PubMed Central journal article supplement (PMC1472539)
Supplement: pnas_0600871103_3.pdf [file pnas_0600871103_3.pdf]

**Table 3. PDYN mRNA expression (disintegrations per minute per mg) in associative regions of the putamen and caudate nucleus**

| <b>Putamen</b>         | <b>Mean ± SEM</b> | <b>P value</b> | <b>F value</b>     | <b>Post hoc</b>              |
|------------------------|-------------------|----------------|--------------------|------------------------------|
| Control                | 63.66 ± 3.99      | 0.067          | $F_{2,39} = 5.195$ |                              |
| Heroin                 | 53.50 ± 3.19      |                |                    |                              |
| Control A/A            | 65.01 ± 4.06      | 0.097          | $F_{3,36} = 3.883$ | NS                           |
| Heroin A/A             | 50.57 ± 3.25      |                |                    |                              |
| Heroin A/G             | 55.67 ± 6.62      |                |                    |                              |
| <b>Caudate nucleus</b> |                   |                |                    |                              |
| Control                | 61.56 ± 4.94      | 0.002          | $F_{2,43} = 9.425$ |                              |
| Heroin                 | 53.88 ± 3.18      |                |                    |                              |
| Control A/A            | 61.87 ± 5.29      | 0.002          | $F_{3,39} = 6.971$ | C A/A vs. H A/A, $P = 0.078$ |
| Heroin A/A             | 52.78 ± 3.32      |                |                    | C A/A vs. H A/G, $P < 0.035$ |
| Heroin A/G             | 47.73 ± 5.68      |                |                    | H A/A vs. H A/G NS           |

NS, not significant.
