# Supplementary material
Source: PubMed Central journal article supplement (PMC1472539)
Supplement: pnas_0600871103_4.pdf [file pnas_0600871103_4.pdf]

**Table 4. List of primer pairs**

|                                             |                                 |                                                      |
|---------------------------------------------|---------------------------------|------------------------------------------------------|
| <b>Primers used for genotyping</b>          |                                 |                                                      |
| <b>OPMR1 A118G SNP</b>                      |                                 |                                                      |
| ArtUp                                       | 5'-ccgtcagtagcatggacagcagcgggtg |                                                      |
| R2-D2                                       | 5'-gttcggaccgcatgggtcggacagat   |                                                      |
| <b>OPDR1 T80G SNP</b>                       |                                 |                                                      |
| Ex1F27Cu                                    | 5'-gtagagcgcggtgatggcgat        |                                                      |
| ExF27Cd                                     | 5'-cctcggacgcctaccctagcgcgt     |                                                      |
| <b>Primers used for riboprobe synthesis</b> |                                 |                                                      |
| <b>ProPC2 accession number NM_003922</b>    |                                 |                                                      |
|                                             | Bases                           |                                                      |
| Outer F                                     | 389-408                         | 5'-atctgctgagcggaccgtct                              |
| Outer R                                     | 821-843                         | 5'-ggaggagatagtc aatcccatca                          |
| Inner F                                     | 452-473T                        | 5'-ctgtaatacagact cactatagggcaaag ctcgccaagttgcagca  |
| Inner R                                     | 755-776                         | 5'-gggattt aggtgacac tatagaaccaggcttc agccacattcaaa  |
| <b>proHERC1 accession number NM_002594</b>  |                                 |                                                      |
|                                             | Bases                           |                                                      |
| Outer F                                     | 185-207                         | 5'-ggagttgctgttctgtattctaa                           |
| Outer R                                     | 607-629                         | 5'-caggcatcatccaactttgtctt                           |
| Inner F                                     | 264-285                         | 5'-tctgtaatacagactcactataggggaccacagttgccagactttgaa  |
| Inner R                                     | 550-572                         | 5'-gggattt aggtgacacta tagaacaccc atttctataagtgcatca |
